# Supplementary material for: Sobre el recurso de reposición
Source: HighWire-hosted journal article supplement (doi:10.1136/tsaco-2021-000831), 2001-01-01
Supplement: tsaco-2021-000831supp003_data_supplement.pdf [file tsaco-2021-000831supp003_data_supplement.pdf]

**S3 Table. Distribution of Abbreviated Injury Scale scores in the studied patients**

| <b>AIS</b> | <b>Head and Neck</b> | <b>Face</b> | <b>Chest</b> | <b>Abdomen</b> | <b>Extremities</b> | <b>Skin</b> |
|------------|----------------------|-------------|--------------|----------------|--------------------|-------------|
| 0          | 154                  | 222         | 100          | 154            | 77                 | 55          |
| 1          | 3                    | 5           | 3            | 7              | 0                  | 156         |
| 2          | 11                   | 20          | 4            | 20             | 40                 | 39          |
| 3          | 47                   | 3           | 58           | 44             | 115                | 0           |
| 4          | 24                   | 0           | 72           | 20             | 13                 | 0           |
| 5          | 11                   | 0           | 13           | 5              | 5                  | 0           |
