# Supplementary figures and images for: Sobre el recurso de reposición
Source: HighWire-hosted journal article supplement (doi:10.1136/tsaco-2021-000831), 2001-01-01

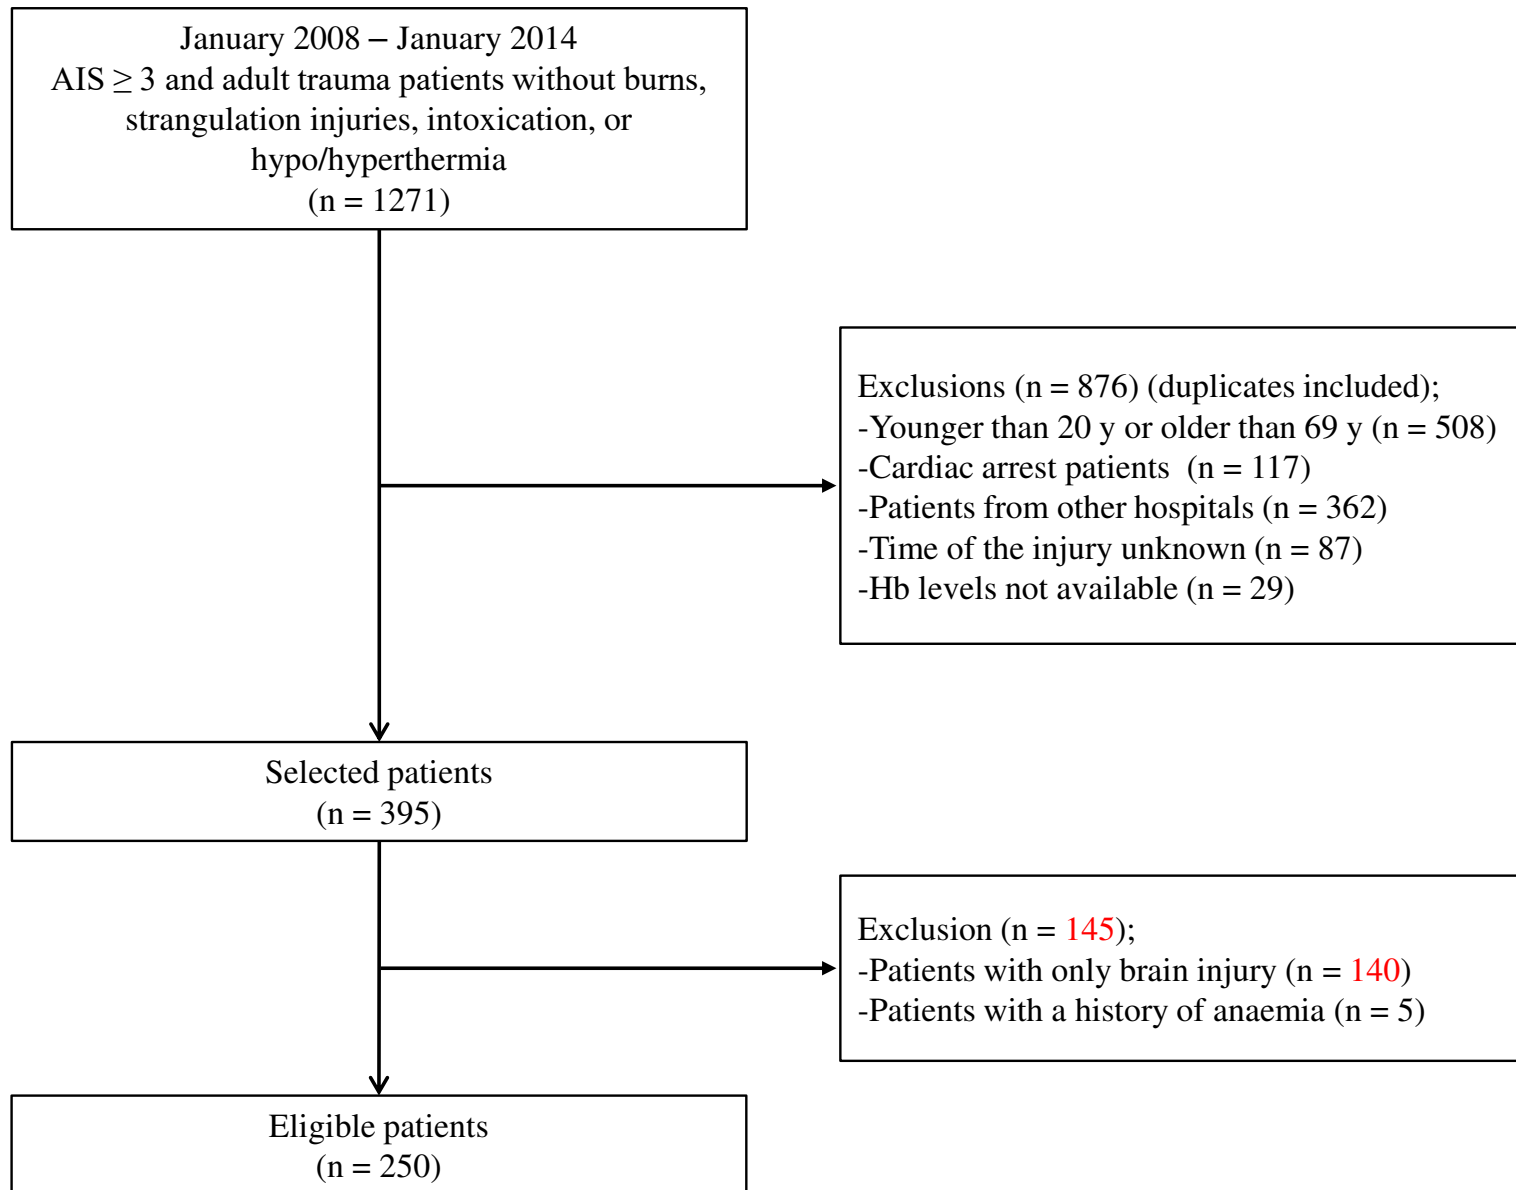

Supplement: tsaco-2021-000831supp002_data_supplement.pdf [file tsaco-2021-000831supp002_data_supplement.pdf]
